# Supplementary material
Source: publisher site journal article supplement (http://static.cambridge.org/content/id/urn:cambridge.org:id:article:S0899823X19001417/resource/name/S0899823X19001417supp001.doc)
Supplement: Supplementary file 1 [file S0899823X19001417supp001.doc]

**Supplementary Table S1**

**Illness characteristics associated with healthcare workers working during episodes of acute respiratory illness, Canada, 2010/2011-2013/2014; addition of fever as a covariate**

| Characteristic | | Diary day worked  n=52811 (%) | Crude RR  (95%CI) | Adjusted2 RR  (95%CI)  N=64951 |
| --- | --- | --- | --- | --- |
| Symptoms3 | | | | |
|  | Respiratory symptoms only | 2600 (92.7) | Referent | Referent |
|  | Respiratory with constitutional symptoms | 2250 (74.3) | 0.81 (0.79-0.83)** | 1.01 (0.98-1.04) |
|  | Respiratory with gastrointestinal symptoms | 58 (80.6) | 0.85 (0.75-0.96)* | 0.89 (0.79-1.00) |
|  | Respiratory with constitutional and gastrointestinal symptoms | 373 (58.5) | 0.65 (0.60-0.70)** | 0.93 (0.86-0.99)* |
| Symptom severity score4 | | - | 0.95 (0.94-0.95)** | 0.95 (0.94-0.95)** |
| Illness stage | | | | |
|  | Onset day | 1346 (88.2) | Referent | Referent |
|  | Day 1-day 3 | 2138 (75.2) | 0. 87 (0.85-0.90)** | 0.87 (0.85-0.89)** |
|  | Day 4 or later | 1797 (82.7) | 0. 99 (0.96-1.02) | 0.92 (0.89-0.95)** |
| Healthcare provider consulted5 | | | | |
|  | No | 5113 (82.1) | Referent | Referent |
|  | Yes | 130 (48.9) | 0.73 (0.66-0.81)** | 0.83 (0.76-0.92)** |
| Fever (≥37.8oC) | |  |  |  |
|  | No (or missing) | 5199 (82.0) | Referent | Referent |
|  | Yes | 82 (40.2) | 0.58 (0.50-0.67)** | 0.84 (0.72-0.98)* |

*p<0.05; ** p<0.001

CI confidence interval; RR: relative risk;

1Of 6542 illness diaries submitted for scheduled work days (data missing for some covariates)

2Adjusted for the variables included in column, study season, hospital, age, sex, occupation and work area

3Respiratory: runny or stuffy nose, sore or scratchy throat, hoarseness, cough, or shortness of breath; Gastrointestinal: nausea, vomiting or diarrhoea; Constitutional: fever, headache, chills, muscle pain or joint pain

4Sum of 10 respiratory and constitutional symptoms’ ratings; 4-point scale (0 to 3 for absent to severe)

5Consulted with physician, nurse practitioner, occupational health nurse/physician, or Telehealth nurse
